# Supplementary material
Source: publisher site journal article supplement (https://www.dovepress.com/article/433350)
Supplement: Supplementary file 1 [file get_supplementary_file.php]

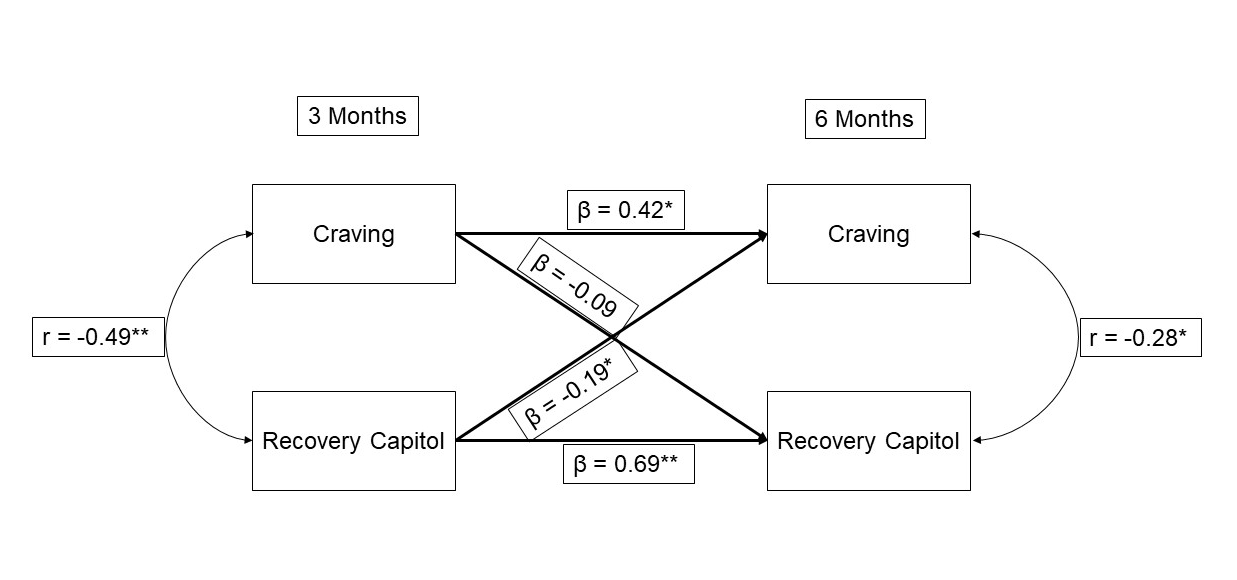


Supplemental Figure 1: Path Coefficients (Standardized) – Month 3 to Month 6

**Notes**: Recovery Capitol = Assessment of Recovery Capital total score; Craving = Brief Addiction Monitor (BAM) question #8. n = 101, consisting of complete data sample used in analysis. *p < 0.05; **p < 0.01.

**Abbreviations:** r, Pearson’s correlation coefficient; β, pathway coefficient.
